# Supplementary material for: Effectiveness and safety of COVID-19 vaccines on maternal and perinatal outcomes: a systematic review and meta-analysis
Source: PubMed Central journal article supplement (PMC11002410; doi:10.1136/bmjgh-2023-014247), 2024-04-04
Supplement: bmjgh-2023-014247supp002.pdf [file bmjgh-2023-014247supp002.pdf]

## Appendix 2. Details of search strategies used to include studies in the living systematic review on COVID-19 in pregnant and recently pregnant women

### 1. Cochrane Gynaecology and Fertility

#### Pubmed

| Item | Term                                                |
|------|-----------------------------------------------------|
| 1    | pregnancy/                                          |
| 2    | pregnan*.tw.                                        |
| 3    | neonatal.tw.                                        |
| 4    | perinatal.tw.                                       |
| 5    | mothers/.                                           |
| 6    | mother.tw.                                          |
| 7    | maternal.tw.                                        |
| 8    | obstetric.tw.                                       |
| 9    | infant, newborn/                                    |
| 10   | infant.tw.                                          |
| 11   | newborn.tw.                                         |
| 12   | child*.tw.                                          |
| 13   | or/1-12                                             |
| 14   | COVID-19.tw.                                        |
| 15   | COVID-2019.tw.                                      |
| 16   | severe acute respiratory syndrome coronavirus 2.tw. |
| 17   | 2019-nCoV.tw.                                       |
| 18   | SARS-CoV-2.tw.                                      |
| 19   | 2019nCoV.tw                                         |
| 20   | or/14-19                                            |
| 21   | coronavirus.tw.                                     |
| 22   | 2019/12.pd                                          |
| 23   | 2020.pd.                                            |
| 24   | or/22-23                                            |
| 25   | 21 and 24                                           |
| 24   | or/20-25                                            |
| 25   | 13 and 24                                           |

#### Google Scholar and Google

Using the following text words (pregnancy OR neonatal OR perinatal OR maternal OR obstetric OR newborn) AND (COVID-19 or SARS-Cov-2)

## 2. EPPI Centre

The MEDLINE search strategy is the OVID Expert Search as developed by Wolters Kluwer and available at <http://tools.ovid.com/coronavirus/>

### MEDLINE search strategy

- 1 exp Coronavirus/
- 2 exp Coronavirus Infections/
- 3 (coronavirus\* or corona virus\* or OC43 or NL63 or 229E or HKU1 or HCoV\* or ncov\* or covid\* or sars-cov\* or sarscov\* or Sars-coronavirus\* or Severe Acute Respiratory Syndrome Coronavirus\*).mp.
- 4 (or/1-3) and ((20191\* or 202\*).dp. or 20190101:20301231.(ep).)
- 5 4 not (SARS or SARS-CoV or MERS or MERS-CoV or Middle East respiratory syndrome or camel\* or dromedar\* or equine or coronary or coronal or covidence\* or covidien or influenza virus or HIV or bovine or calves or TGEV or feline or porcine or BCoV or PED or PEDV or PDCoV or FIPV or FCoV or SADS-CoV or canine or CCov or zoonotic or avian influenza or H1N1 or H5N1 or H5N6 or IBV or murine corona\*).mp.
- 6 ((pneumonia or covid\* or coronavirus\* or corona virus\* or ncov\* or 2019-ncov or sars\*).mp. or exp pneumonia/) and Wuhan.mp.
- 7 (2019-ncov or ncov19 or ncov-19 or 2019-novel CoV or sars-cov2 or sars-cov-2 or sarscov2 or sarscov-2 or Sars-coronavirus2 or Sars-coronavirus-2 or SARS-like coronavirus\* or coronavirus-19 or covid19 or covid-19 or covid 2019 or ((novel or new or nouveau) adj2 (CoV on nCoV or covid or coronavirus\* or corona virus or Pandemi\*2)) or ((covid or covid19 or covid-19) and pandemic\*2) or (coronavirus\* and pneumonia)).mp.
- 8 COVID-19.rx,px,ox. or severe acute respiratory syndrome coronavirus 2.os.
- 9 ("32240632" or "32236488" or "32268021" or "32267941" or "32169616" or "32267649" or "32267499" or "32267344" or "32248853" or "32246156" or "32243118" or "32240583" or "32237674" or "32234725" or "32173381" or "32227595" or "32185863" or "32221979" or "32213260" or "32205350" or "32202721" or "32197097" or "32196032" or "32188729" or "32176889" or "32088947" or "32277065" or "32273472" or "32273444" or "32145185" or "31917786" or "32267384" or "32265186" or "32253187" or "32265567" or "32231286" or "32105468" or "32179788" or "32152361" or "32152148" or "32140676" or "32053580" or "32029604" or "32127714" or "32047315" or "32020111" or "32267950" or "32249952" or "32172715").ui.
- 10 or/6-9
- 11 5 or 10

The Embase search strategy as at 21st April 2020

- 1 exp Coronavirus Infections/
- 2 exp coronavirinae/
- 3 (coronavirus\* or corona virus\* or OC43 or NL63 or 229E or HKU1 or HCoV\* or ncov\* or covid\* or sars-cov\* or sarscov\* or Sars-coronavirus\* or Severe Acute Respiratory Syndrome Coronavirus\*).mp.
- 4 or/1-3
- 5 4 not (SARS or SARS-CoV or MERS or MERS-CoV or Middle East respiratory syndrome or camel\* or dromedar\* or equine or coronary or coronal or covidence\* or covidien or

influenza virus or HIV or bovine or calves or TGEV or feline or porcine or BCoV or PED or PEDV or PDCoV or FIPV or FCoV or SADS-CoV or canine or CCov or zoonotic or avian influenza or H1N1 or H5N1 or H5N6 or IBV or murine corona\*).mp.

6 ((pneumonia or covid\* or coronavirus\* or corona virus\* or ncov\* or 2019-ncov or sars\*).mp. or exp pneumonia/) and Wuhan.mp.

7 (2019-ncov or ncov19 or ncov-19 or 2019-novel CoV or sars-cov2 or sars-cov-2 or sarscov2 or sarscov-2 or Sars-coronavirus2 or Sars-coronavirus-2 or SARS-like coronavirus\* or coronavirus-19 or covid19 or covid-19 or covid 2019 or ((novel or new or nouveau) adj2 (CoV on nCoV or covid or coronavirus\* or corona virus or Pandemi\*2)) or ((covid or covid19 or covid-19) and pandemic\*2) or (coronavirus\* and pneumonia)).mp.

8 6 or 7

9 5 or 8

### 3. WHO COVID-19 database

The WHO COVID-19 database contained articles on the novel coronavirus from the following sources:

- Web of Science
- Oxford Academic Journals
- Pubmed NIH
- Ishiyaku
- J Stage
- Cinii articles
- Ichushi Web – JAMAS
- Science Direct
- Wiley Online Journals
- JAMA Network
- British Medical Journal
- Mary Ann Liebert
- New England Journal of Medicine
- Sage Publications
- Taylor and Francis Online
- Springer Link
- Biomed Central
- MDPI
- ASM
- PLOS
- The Lancet
- Cell Press
- Cell Press Search Interface
- EMBASE
- KoreaMed

- Global Index Medics
- MMWR
- Epidemiology and Health
- American Chemical Society
- Eurosurveillance
- Cambridge Press
- LWW
- Airiti
- JIMR
- Emerging Infectious Diseases
- Osong Public Health & Research Perspectives
- BASE Bielefeld
- LitCOVID

An additional step using the following search terms was added to the WHO search from 12<sup>th</sup> May 2020

tw:(newborn\* OR mother\* OR bab\* OR wom\* OR pregnan\* OR postpart\* OR neonat\* OR fetus OR fetal OR newborn OR mother OR bab\*)
