# Supplementary material for: Effectiveness and safety of COVID-19 vaccines on maternal and perinatal outcomes: a systematic review and meta-analysis
Source: PubMed Central journal article supplement (PMC11002410; doi:10.1136/bmjgh-2023-014247), 2024-04-04
Supplement: bmjgh-2023-014247supp003.pdf [file bmjgh-2023-014247supp003.pdf]

## Appendix 3. Characteristics of included studies

| First author, year of publication | Study design         | Study setting: country and hospital<br><br>Collection period                   | Adjustement variables | Inclusion and exclusion criteria                                                                                                                                                                    | Population exposed to covid-19 vaccine | Vaccine platform<br><br>Vaccine product<br><br>Doses (no. women vaccinated) | Time of vaccination (trimester)  | Reported outcomes of interest  |
|-----------------------------------|----------------------|--------------------------------------------------------------------------------|-----------------------|-----------------------------------------------------------------------------------------------------------------------------------------------------------------------------------------------------|----------------------------------------|-----------------------------------------------------------------------------|----------------------------------|--------------------------------|
| Arulappen AL, 2022                | Retrospective cohort | Malaysia<br><br>6 General hospitals in the state of Penang<br><br>March 2021 - | NA                    | <i>Inclusion</i><br>All pregnant employees who consented to take the mRNA vaccine.<br><br><i>Exclusion</i><br>Vaccinated pregnant employees who refused to give consent to participate in the study | 121                                    | mRNA<br><br>Pfizer-BioNTech<br><br>One dose (121)<br>Two doses (121)        | During pregnancy (1st, 2nd, 3rd) | Headache<br>Myalgia<br>Fatigue |

|                  |                    |                                                                                                           |    |                                                                                                                                                                                                                                                                             |    |                                                                    |                                  |                                                                   |
|------------------|--------------------|-----------------------------------------------------------------------------------------------------------|----|-----------------------------------------------------------------------------------------------------------------------------------------------------------------------------------------------------------------------------------------------------------------------------|----|--------------------------------------------------------------------|----------------------------------|-------------------------------------------------------------------|
| Bashi TBM, 2021  | Prospective cohort | Israel<br><br>University affiliated tertiary medical center in Tel Aviv<br><br>December 2020 – March 2021 | NA | <i>Inclusion</i><br>All women who received the mRNA COVID-19 vaccine during pregnancy who had not prior COVID-19 infection.<br><br><i>Exclusion</i><br>Unverified timing of vaccination, prior or active infection with covid-19 and refusal to sign informed consent form. | 58 | mRNA<br><br>Pfizer-BioNTech<br><br>One dose (19)<br>Two doses (39) | During pregnancy (3rd)           | Pain at injection site<br>Headache<br>Myalgia<br>Fatigue<br>Fever |
| Beharier O, 2021 | Prospective cohort | Israel<br><br>8 medical centres in Israel<br><br>January 2021 – March 2021                                | NA | <i>Inclusion</i><br>Pregnant women at an age of 18 years or older and a willingness to participate and provide                                                                                                                                                              | 92 | mRNA<br><br>Pfizer-BioNTech<br><br>Non specified                   | During pregnancy (Non specified) | Preterm birth <37 weeks<br><br>NICU admission                     |

|                  |                      |                                                                                      |               |                                                                                                                                                                                                                                       |     |                                                                                                    |                             |                                                                                                                                                                                          |
|------------------|----------------------|--------------------------------------------------------------------------------------|---------------|---------------------------------------------------------------------------------------------------------------------------------------------------------------------------------------------------------------------------------------|-----|----------------------------------------------------------------------------------------------------|-----------------------------|------------------------------------------------------------------------------------------------------------------------------------------------------------------------------------------|
|                  |                      |                                                                                      |               | informed consent<br><br><i>Exclusion</i><br>Pregnant women with active maternal COVID-19 disease at delivery                                                                                                                          |     |                                                                                                    |                             |                                                                                                                                                                                          |
| Blakeway H, 2021 | Retrospective cohort | United Kingdom<br><br>St George's University Hospitals<br><br>March 2020 – July 2021 | Non specified | <i>Inclusion</i><br>All pregnant women with known vaccination status and complete maternal and foetal outcome data<br><br><i>Exclusion</i><br>Women who were vaccinated entirely (i.e., all doses) before pregnancy or after birth or | 140 | mRNA/Viral vector<br><br>Pfizer-BioNTech<br>Moderna<br>AZD<br><br>One dose (114)<br>Two doses (26) | During pregnancy (2nd, 3rd) | Maternal covid infection<br>Severe covid disease<br><br>Caesarean section<br>NICU admission<br>Stillbirth<br>Gestational diabetes<br>Postpartum haemorrhage<br>Small for gestational age |

|                  |                    |                                                                        |    |                                                                                                                                 |     |                                                                                                   |                                  |                                                                  |
|------------------|--------------------|------------------------------------------------------------------------|----|---------------------------------------------------------------------------------------------------------------------------------|-----|---------------------------------------------------------------------------------------------------|----------------------------------|------------------------------------------------------------------|
|                  |                    |                                                                        |    | women who had pregnancies complicated by foetal aneuploidy or genetic syndromes.                                                |     |                                                                                                   |                                  |                                                                  |
| Blakeway H, 2022 | Prospective cohort | UK<br><br>April 2021 – September 2021                                  | NA | <i>Exclusion</i><br>Women who did not return the questionnaire.                                                                 | 67  | mRNA/Viral vector<br><br>Pfizer-BioNTech<br>Moderna<br>AZD<br><br>One dose (67)<br>Two doses (67) | During pregnancy (1st, 2nd, 3rd) | Headache<br>Fever                                                |
| Bleicher I, 2021 | Prospective cohort | Israel<br><br>Online questionnaire<br><br>January 2021 – February 2021 | NA | <i>Inclusion</i><br>All pregnant women that properly filled out the data in questionnaire (valid e-mail address, ID number that | 202 | mRNA<br><br>Pfizer-BioNTech<br><br>One dose (68)<br>Two doses (124)                               | During pregnancy (1st, 2nd, 3rd) | Maternal covid infection<br>Miscarriage<br><br>Headache<br>Fever |

|                 |                      |                                                 |                                                             |                                                                                                                                                                                                                                                                                                                      |    |                                                |                                  |                                                               |
|-----------------|----------------------|-------------------------------------------------|-------------------------------------------------------------|----------------------------------------------------------------------------------------------------------------------------------------------------------------------------------------------------------------------------------------------------------------------------------------------------------------------|----|------------------------------------------------|----------------------------------|---------------------------------------------------------------|
|                 |                      |                                                 |                                                             | <p>matches the information in both questionnaires and answering all questions until the form is submitted)</p> <p><i>Exclusion</i><br/>Registries that were invalid or incompatible with the demands (for example: invalid e-mail address, wrong registration of last menstrual period that could not be correct</p> |    |                                                |                                  |                                                               |
| Boelig RC, 2022 | Retrospective cohort | USA<br><br>Thomas Jefferson University Hospital | Age<br>BMI<br>Ethnicity<br>Diabetes<br>Chronic hypertension | <p><i>Inclusion</i></p> <p><i>Exclusion</i><br/>Pregnant patients with both COVID-</p>                                                                                                                                                                                                                               | 49 | mRNA<br><br>Non specified<br><br>Non specified | During pregnancy (non specified) | Preterm birth <37 weeks<br>Hypertensive disorder in pregnancy |

|                          |                    |                                          |                                                    |                                                                                                                                                                                                                                                                                 |     |                                                                      |                                  |                                                                   |
|--------------------------|--------------------|------------------------------------------|----------------------------------------------------|---------------------------------------------------------------------------------------------------------------------------------------------------------------------------------------------------------------------------------------------------------------------------------|-----|----------------------------------------------------------------------|----------------------------------|-------------------------------------------------------------------|
|                          |                    | March 2020 – July 2021                   | Prior full-term delivery<br>Prior preterm delivery | 19 disease and vaccination                                                                                                                                                                                                                                                      |     |                                                                      |                                  |                                                                   |
| Bookstein-Peretz S, 2021 | Case-control study | Israel<br><br>January 2021-February 2021 | NA                                                 | <i>Inclusion</i><br>Pregnant women who were vaccinated<br>By a 2-dose regimen of BNT162b2 vaccine between 2-40weeks of gestation and were recruited via social media publications<br><br><i>Exclusion</i><br>Pregnant women who gave birth or had an abortion before the second | 390 | mRNA<br><br>Pfizer-BioNTech<br><br>One dose (390)<br>Two doses (390) | During pregnancy (1st, 2nd, 3rd) | Pain at injection site<br>Headache<br>Myalgia<br>Fatigue<br>Fever |

|               |                            |                                                                        |                                                      |                                                                                                                                                                                                        |      |                                                               |                             |                          |
|---------------|----------------------------|------------------------------------------------------------------------|------------------------------------------------------|--------------------------------------------------------------------------------------------------------------------------------------------------------------------------------------------------------|------|---------------------------------------------------------------|-----------------------------|--------------------------|
|               |                            |                                                                        |                                                      | dose of vaccine                                                                                                                                                                                        |      |                                                               |                             |                          |
| Butt AA, 2021 | Cohort                     | Qatar<br><br>Hamad Medical Corporation<br><br>December 2020 – May 2021 | 10 years age group<br>Nationality<br>Gestational age | <i>Exclusion</i><br>Women with less than 14 days of follow-up after the second dose, those with a single dose, those with prior SARS-CoV-2 infection and those with pregnancy onset after vaccination. | 1053 | mRNA<br><br>Pfizer-BioNTech<br>Moderna<br><br>Two doses (407) | During pregnancy (1st, 2nd) | Maternal covid infection |
|               | Test negative case control |                                                                        |                                                      | <i>Inclusion</i><br>All confirmed pregnant women who presented to Hamad Medical Corporation<br><br><i>Exclusion</i><br>Women who were tested for                                                       |      | mRNA<br><br>Pfizer-BioNTech<br>Moderna<br><br>Two doses (103) |                             |                          |

|             |                      |                                                                      |                                                                                                             |                                                                                                                                                                                                                                             |     |                                                                                   |                  |             |
|-------------|----------------------|----------------------------------------------------------------------|-------------------------------------------------------------------------------------------------------------|---------------------------------------------------------------------------------------------------------------------------------------------------------------------------------------------------------------------------------------------|-----|-----------------------------------------------------------------------------------|------------------|-------------|
|             |                      |                                                                      |                                                                                                             | SARS-CoV-2 by RT-PCR on a nasopharyngeal swab prior to pregnancy and those who had no SARS-CoV-2 testing done between December 20, 2020 and May 30, 2021, as well as those who had at least one dose of vaccination before pregnancy onset. |     |                                                                                   |                  |             |
| Cao M, 2022 | Retrospective cohort | China<br>Guangzhou Medical University<br>March 2021 – September 2021 | Age<br>Infertility duration<br>Number of COS cycles<br>Protocols of COS<br>Endometrial preparation protocol | <i>Inclusion</i><br>Women with confirmed vaccination status from public health surveillance system record of their smartphone                                                                                                               | 502 | Inactivated virus<br><br>Sinovac-CoronaVac<br>Sinopharm BIBP<br><br>One dose (30) | Before pregnancy | Miscarriage |



|  |  |  |                                                                |                                                                                                                                                                                                                                                                                                                                                    |  |                 |  |  |
|--|--|--|----------------------------------------------------------------|----------------------------------------------------------------------------------------------------------------------------------------------------------------------------------------------------------------------------------------------------------------------------------------------------------------------------------------------------|--|-----------------|--|--|
|  |  |  | Number of embryos transferred<br>Number of top-quality embryos | app, the first or second cycle of frozen-thawed embryos transferred, women in vaccinated group had embryos frozen prior to the exposure to Covid-19 vaccines, and women aged 20-40 years old<br><br><i>Exclusion</i><br>Women with three or more cycles of controlled ovarian stimulation, women with repeated spontaneous miscarriage, women with |  | Two doses (472) |  |  |
|--|--|--|----------------------------------------------------------------|----------------------------------------------------------------------------------------------------------------------------------------------------------------------------------------------------------------------------------------------------------------------------------------------------------------------------------------------------|--|-----------------|--|--|

|                  |                      |                                                                              |                                                                        |                                                                                                                                                                                         |       |                                                                    |                             |                                                     |
|------------------|----------------------|------------------------------------------------------------------------------|------------------------------------------------------------------------|-----------------------------------------------------------------------------------------------------------------------------------------------------------------------------------------|-------|--------------------------------------------------------------------|-----------------------------|-----------------------------------------------------|
|                  |                      |                                                                              |                                                                        | repeated implantation failure, cycles with surgically obtained sperms, cycles with sperm donor, and infertile couples with severe systemic disease which might reduce conception chance |       |                                                                    |                             |                                                     |
| Carlsen EO, 2022 | Retrospective cohort | Norway<br>Medical Birth Registry of Norway<br>September 2021 – February 2022 | Age<br>Parity<br>Education<br>Country of birth<br>Country of residence | <i>Inclusion</i><br>All live births in Norway between 1 September 2021 and 28 February 2022.<br><br><i>Exclusion</i><br>Mother and infants with no permanent national                   | 14312 | mRNA<br>Non specified<br><br>Two doses (8915)<br>Three doses (824) | During pregnancy (2nd, 3rd) | Maternal covid infection<br>Preterm birth <37 weeks |

|                  |                      |                                                                                          |                                             | identification number.                               |     |                                                                                          |                        |                                                                                                                                                                                                                                                                |
|------------------|----------------------|------------------------------------------------------------------------------------------|---------------------------------------------|------------------------------------------------------|-----|------------------------------------------------------------------------------------------|------------------------|----------------------------------------------------------------------------------------------------------------------------------------------------------------------------------------------------------------------------------------------------------------|
| Citu IM, 2022    | Prospective cohort   | Romania<br><br>Timisoara Municipality Emergency Hospital<br><br>May 2021 – December 2021 | NA                                          | <i>Inclusion</i>                                     | 227 | mRNA/Viral vector<br><br>Pfizer-BioNTech Janssen<br><br>One dose (58)<br>Two doses (115) | During pregnancy (3rd) | Gestational diabetes<br>Hypertensive disorder in pregnancy<br>Caesarean section<br>Preterm birth <37 weeks<br>Postpartum haemorrhage<br>Abnormal apgar 5<br>Small for gestational age<br><br>Pain at injection site<br>Myalgia<br>Headache<br>Fever<br>Fatigue |
| Citu IM (1) 2022 | Retrospective cohort | Romania<br><br>Obstetrics and gynecology                                                 | Age (> 35 years)<br>Overweight status (>25) | <i>Inclusion</i><br>All pregnancies in mothers older | 927 | mRNA<br><br>Pfizer-BioNTech                                                              | During pregnancy (1st) | Miscarriage                                                                                                                                                                                                                                                    |

|                 |                    |                                                                                            |                                                                                                                                                                                                                                         |                                                                                                                                                                                                                                                                     |    |                                                                        |                                         |       |
|-----------------|--------------------|--------------------------------------------------------------------------------------------|-----------------------------------------------------------------------------------------------------------------------------------------------------------------------------------------------------------------------------------------|---------------------------------------------------------------------------------------------------------------------------------------------------------------------------------------------------------------------------------------------------------------------|----|------------------------------------------------------------------------|-----------------------------------------|-------|
|                 |                    | <p>clinic of Timisoara Municipal emergency hospital</p> <p>January 2020 – January 2022</p> | <p>Chronic conditions</p> <p>Previous SARS-CoV-2 infection</p> <p>Smoker</p> <p>Abnormal uterine or cervical anatomy</p> <p>Previous miscarriage</p> <p>Assisted reproductive techniques</p> <p>Vaccine type</p> <p>Number of doses</p> | <p>than 18 years, evaluated from the start of their first trimester during the study period in the clinic. Only pregnant women vaccinated with BNT162b2 or Moderna mRNA-1273.</p> <p><i>Exclusion</i></p> <p>Patients who did not provide consent were excluded</p> |    | <p>Moderna</p> <p>Two doses (927)</p>                                  |                                         |       |
| Collier AY 2021 | Prospective cohort | <p>Israel</p> <p>Beth Israel Deaconess Medical center</p>                                  | NA                                                                                                                                                                                                                                      | <p><i>Inclusion</i></p> <p>Women 18 years or older who had received a covid-19 vaccine</p> <p><i>Exclusion</i></p>                                                                                                                                                  | 30 | <p>mRNA</p> <p>Pfizer-BioNTech</p> <p>Moderna</p> <p>One dose (30)</p> | <p>During pregnancy (1st, 2nd, 3rd)</p> | Fever |

|                 |                      |                                                                             |                                                                                                                                                                                        |                                                                                                                                                                                           |       |                                                                                     |                                  |                                                                                                                         |
|-----------------|----------------------|-----------------------------------------------------------------------------|----------------------------------------------------------------------------------------------------------------------------------------------------------------------------------------|-------------------------------------------------------------------------------------------------------------------------------------------------------------------------------------------|-------|-------------------------------------------------------------------------------------|----------------------------------|-------------------------------------------------------------------------------------------------------------------------|
|                 |                      | December 2020 – March 2021                                                  |                                                                                                                                                                                        |                                                                                                                                                                                           |       | Two doses (29)                                                                      |                                  |                                                                                                                         |
| COVID-NET, 2021 | Retrospective cohort | USA<br><br>Nk<br><br>January 2021 – November 2021                           | NA                                                                                                                                                                                     | <i>Inclusion</i>                                                                                                                                                                          | 11    | mRNA/Viral vector<br><br>Pfizer-BioNTech<br>Moderna<br>Janssen<br><br>Non specified | During pregnancy (non specified) | Severe covid disease<br><br>Miscarriage<br>Caesarean section<br>Maternal death<br>Preterm birth <37 weeks<br>Stillbirth |
| Dagan N, 2021   | Prospective cohort   | Israel<br><br>Clalit Health Services (CHS)<br><br>December 2020 – June 2021 | Age<br>Trimester of pregnancy<br>Geostatistical living area<br>Population sector<br>Count of influenza vaccination in the last 5 years<br>Existence of at least one CDC and prevention | <i>Inclusion</i><br>All pregnant women aged 16 years or older, with continuous membership in CHS<br>for 1 complete year, no previous positive SARS-CoV-2 PCR test, no previous SARS-CoV-2 | 10861 | mRNA<br><br>Pfizer-BioNTech<br><br>Two doses (10861)                                | During pregnancy (1st, 2nd, 3rd) | Maternal covid infection<br>Severe covid disease<br>Maternal hospital admission<br>Maternal death                       |

|               |                            |                                                                       |                                                                  |                                                                                                                                                                                                                                                                        |     |                                                    |                             |                                           |
|---------------|----------------------------|-----------------------------------------------------------------------|------------------------------------------------------------------|------------------------------------------------------------------------------------------------------------------------------------------------------------------------------------------------------------------------------------------------------------------------|-----|----------------------------------------------------|-----------------------------|-------------------------------------------|
|               |                            |                                                                       | risk factor for severe disease (obesity, diabetes, hypertension) | vaccination, not residing in long-term care facilities, no home confinement due to medical reasons, not being a healthcare worker and no interaction with the healthcare system in the previous 2 d<br><br><i>Exclusion</i><br>Pregnant women with missing data in CHS |     |                                                    |                             |                                           |
| Danino D 2022 | Test negative case-control | Israel<br><br>Soroka Medical center, Schneider medical center, Shamir | Ethnicity<br>Prematurity                                         | <i>Inclusion</i><br>Symptomatic infants suspected of SARS-CoV-2 infection by a physician                                                                                                                                                                               | 202 | mRNA<br><br>Pfizer-BioNTech<br><br>Two doses (202) | During pregnancy (2nd, 3rd) | Neonatal covid infection<br>Preterm birth |

|                 |                      |                                                                          |                                      |                                                                                                                |       |                                                                                              |                                  |                                                                                                                   |
|-----------------|----------------------|--------------------------------------------------------------------------|--------------------------------------|----------------------------------------------------------------------------------------------------------------|-------|----------------------------------------------------------------------------------------------|----------------------------------|-------------------------------------------------------------------------------------------------------------------|
|                 |                      | medical center                                                           |                                      | <i>Exclusion</i><br>Infants who were tested during screening or were asymptomatic                              |       |                                                                                              |                                  |                                                                                                                   |
|                 |                      | March 2021 – November 2021                                               |                                      |                                                                                                                |       |                                                                                              |                                  |                                                                                                                   |
| DeSilva M, 2022 | Retrospective cohort | USA<br>Eighth vaccine safety datalink sites<br>December 2020 – July 2021 | NA                                   | <i>Inclusion</i><br>Pregnant women between 16 and 49 years                                                     | 45232 | mRNA/Viral vector<br>Pfizer-BioNTech<br>Janssen<br><br>One dose (12438)<br>Two doses (32794) | During pregnancy (1st, 2nd, 3rd) | Fever<br>Fatigue                                                                                                  |
| Dick A, 2022    | Retrospective cohort | Israel<br>Hadassah-Hebrew University Center<br>December 2020 – July 2021 | Age<br>BMI<br>Nulliparity<br>Smoking | <i>Inclusion</i><br>Women with singleton deliveries from December 2020 until July 2021<br><br><i>Exclusion</i> | 2305  | mRNA<br>Pfizer-BioNTech<br><br>Two doses (non specified)                                     | During pregnancy (2nd, 3rd)      | Preterm birth <37 weeks<br>Small for gestational age<br>Caesarean section<br>Postpartum haemorrhage<br>Stillbirth |

|                  |                      |                                                  |                                                              |                                                                                                                                                                                           |      |                                                                                     |                        |                                                                                                                                                                                 |
|------------------|----------------------|--------------------------------------------------|--------------------------------------------------------------|-------------------------------------------------------------------------------------------------------------------------------------------------------------------------------------------|------|-------------------------------------------------------------------------------------|------------------------|---------------------------------------------------------------------------------------------------------------------------------------------------------------------------------|
|                  |                      |                                                  |                                                              | Women with multiple pregnancy, vaccination prior to pregnancy, COVID-19 infection during or before pregnancy, or unknown timing of vaccination                                            |      | Three doses (non specified)                                                         |                        | Hypertensive disorder in pregnancy<br>Gestational diabetes<br>Abnormal apgar 5                                                                                                  |
| Dick A (1), 2022 | Retrospective cohort | Israel<br><br>Nr<br><br>July 2021 – October 2021 | Age<br>BMI<br>Nulliparity<br>Gestational diabetes<br>Smoking | <i>Inclusion</i><br>Women with singleton pregnancies who delivered in the period July-October 2021<br><br><i>Exclusion</i><br>Women with multiple pregnancy, COVID-19 infection during or | 2845 | mRNA<br><br>Pfizer-BioNTech<br>Moderna<br><br>Two doses (2845)<br>Three doses (294) | During pregnancy (3rd) | Preterm birth <37 weeks<br>Small for gestational age<br>Caesarean section<br>Postpartum haemorrhage<br>Stillbirth<br>Hypertensive disorder in pregnancy<br>Gestational diabetes |



|                   |                    |                                                                         |    |                                                                                                                                                                                                                                                                                                         |     |                                                               |                                  |                                                                   |
|-------------------|--------------------|-------------------------------------------------------------------------|----|---------------------------------------------------------------------------------------------------------------------------------------------------------------------------------------------------------------------------------------------------------------------------------------------------------|-----|---------------------------------------------------------------|----------------------------------|-------------------------------------------------------------------|
|                   |                    |                                                                         |    | before pregnancy, or unknown timing of vaccination                                                                                                                                                                                                                                                      |     |                                                               |                                  | Abnormal appar 5                                                  |
| Favre G (2), 2022 | Prospective cohort | Switzerland<br><br>COVI-PREG registry<br><br>March 2021 – December 2021 | NA | <i>Inclusion</i><br>Pregnant women who received at least one injection of a mRNA vaccine against COVID-19 between one week before their last menstrual period and the end of pregnancy were included in the study.<br><br><i>Exclusion</i><br>Patients under 18 years old who were not able to consent. | 894 | mRNA<br><br>Pfizer-BioNTech<br>Moderna<br><br>Two doses (894) | During pregnancy (1st, 2nd, 3rd) | Pain at injection site<br>Fatigue<br>Headache<br>Myalgia<br>Fever |

|               |                      |                                                                                                          |    |                                                                                                                                                                                    |       |                                                                                                                             |                                  |                                                                     |
|---------------|----------------------|----------------------------------------------------------------------------------------------------------|----|------------------------------------------------------------------------------------------------------------------------------------------------------------------------------------|-------|-----------------------------------------------------------------------------------------------------------------------------|----------------------------------|---------------------------------------------------------------------|
|               |                      |                                                                                                          |    | Women with no information on the date of injection, the occurrence of early adverse events and their description if any or no information about the type of vaccine used           |       |                                                                                                                             |                                  |                                                                     |
| Fell DB, 2022 | Retrospective cohort | Canada<br><br>Better Outcome Registry and Network Ontario Birth Registry<br><br>May 2021 – December 2021 | NA | <i>Inclusion</i><br>Completed pregnancies between 1 May and 31 December 2021<br><br><i>Exclusion</i><br>Births to non-Ontario residents and births from pregnancies conceived less | 43099 | mRNA/Viral vector<br><br>Pfizer-BioNTech<br>Moderna<br>AZD<br><br>One dose (13416)<br>Two doses (29650)<br>Three doses (33) | During pregnancy (1st, 2nd, 3rd) | Stillbirth<br>Preterm birth < 37 weeks<br>Small for gestational age |

|                   |                      |                                                                                                                |    |                                                                                                                                                                                                                              |       |                                                                                 |                                  |                                                                                                               |
|-------------------|----------------------|----------------------------------------------------------------------------------------------------------------|----|------------------------------------------------------------------------------------------------------------------------------------------------------------------------------------------------------------------------------|-------|---------------------------------------------------------------------------------|----------------------------------|---------------------------------------------------------------------------------------------------------------|
|                   |                      |                                                                                                                |    | than 42 weeks before the end of the study. Any records with gestational age < 20 weeks and birth weight < 500 gr, or following pregnancy termination                                                                         |       |                                                                                 |                                  |                                                                                                               |
| Fell DB (1), 2022 | Retrospective cohort | Canada<br><br>Better Outcome Registry and Network Ontario Birth Registry<br><br>December 2020 – September 2021 | NA | <i>Inclusion</i><br>Pregnancies with a birth date or expected due date on or after December 14, 2020 (when the COVID-19 vaccination program began in Ontario)<br><br><i>Exclusion</i><br>Ongoing pregnancies as of September | 22660 | mRNA/Viral vector<br><br>Pfizer-BioNTech<br>Moderna<br>AZD<br><br>Non specified | During pregnancy (1st, 2nd, 3rd) | Maternal covid infection<br>Postpartum haemorrhage<br>Caesarean section<br>NICU admission<br>Abnormal apgar 5 |

|                 |                    |                                   |    |                                                                                                                                                                                                                                                                    |     |                                               |                                  |                                 |
|-----------------|--------------------|-----------------------------------|----|--------------------------------------------------------------------------------------------------------------------------------------------------------------------------------------------------------------------------------------------------------------------|-----|-----------------------------------------------|----------------------------------|---------------------------------|
|                 |                    |                                   |    | 30, 2021, individuals who became pregnant less than 42 weeks before the end of the study period (i.e., those with a last menstrual period after December 9, 2020), records with documented gestational age less than 20 weeks at birth, and pregnancy terminations |     |                                               |                                  |                                 |
| Gandhi AP, 2022 | Prospective cohort | India<br>July 2021 – October 2021 | NA | <i>Inclusion</i><br>Pregnant women registered with the ANC clinics who went for covid-19 vaccination<br><br><i>Exclusion</i>                                                                                                                                       | 247 | Viral vector<br><br>AZD<br><br>One dose (247) | During pregnancy (non specified) | Fever<br>Pain at injection site |

|                    |                      |                                                                                         |    |                                                                                                                                                                                                                                                                                 |      |                                                  |                                  |                                                                                                                                                          |
|--------------------|----------------------|-----------------------------------------------------------------------------------------|----|---------------------------------------------------------------------------------------------------------------------------------------------------------------------------------------------------------------------------------------------------------------------------------|------|--------------------------------------------------|----------------------------------|----------------------------------------------------------------------------------------------------------------------------------------------------------|
|                    |                      |                                                                                         |    | Women less than 18 years of age and who did not consent to participate in the follow-up                                                                                                                                                                                         |      |                                                  |                                  |                                                                                                                                                          |
| Goldshtein I, 2021 | Retrospective cohort | Israel<br><br>Maccabi Healthcare Services Database<br><br>December 2020 – February 2021 | NA | <i>Inclusion</i><br>All pregnant women in the health fund<br><br><i>Exclusion</i><br>Pregnant women who joined the fund less than 1 year preconception, with any preconception records indicating SARS- CoV-2 infection, and members who were vaccinated pre-pregnancy with the | 7530 | mRNA<br><br>Pfizer-BioNTech<br><br>Non specified | During pregnancy (non specified) | Maternal covid infection<br>Maternal death<br>Maternal hospital admission<br>Preterm birth <37 weeks<br>Stillbirth<br>Hypertensive disorder in pregnancy |

|                     |                      |                                                                                     |    |                                                                                                                                                                                                                                                              |       |                                                  |                                  |                                                                              |
|---------------------|----------------------|-------------------------------------------------------------------------------------|----|--------------------------------------------------------------------------------------------------------------------------------------------------------------------------------------------------------------------------------------------------------------|-------|--------------------------------------------------|----------------------------------|------------------------------------------------------------------------------|
|                     |                      |                                                                                     |    | BNT162b2 mRNA vaccine                                                                                                                                                                                                                                        |       |                                                  |                                  |                                                                              |
| Goldshstein I, 2022 | Retrospective cohort | Israel<br><br>Maccabi Healthcare Services Database<br><br>March 2021 – October 2021 | NA | <i>Inclusion</i><br>All singleton live births at any time from March 1, 2021, through September 31, 2021<br><br><i>Exclusion</i><br>Records with no mother-offspring linkage, multiple births, insufficient prior membership time, or missing covariate data | 16697 | mRNA<br><br>Pfizer-BioNTech<br><br>Non specified | During pregnancy (1st, 2nd, 3rd) | Gestational diabetes<br>Preterm birth <37 weeks<br>Small for gestational age |
| Gray KJ, 2021       | Retrospective cohort | USA<br><br>Questionnaire<br><br>December 2020 –                                     | NA | <i>Inclusion</i><br>Pregnant, lactating and non-pregnant women of reproductive                                                                                                                                                                               | 83    | mRNA<br><br>Pfizer-BioNTech<br>Moderna           | During pregnancy (1st, 2nd, 3rd) | Pain at injection site<br>Headache<br>Myalgia<br>Fatigue<br>Fever            |

|                     |                            |                                                            |                                    |                                                                                                                                                                                       |       |                                                      |                                  |                                                                                                   |
|---------------------|----------------------------|------------------------------------------------------------|------------------------------------|---------------------------------------------------------------------------------------------------------------------------------------------------------------------------------------|-------|------------------------------------------------------|----------------------------------|---------------------------------------------------------------------------------------------------|
|                     |                            | February 2021                                              |                                    | age (18-45), able to provide informed consent and receiving the covid-19 vaccine<br><br><i>Exclusion</i>                                                                              |       | One dose (83)<br>Two doses (77)                      |                                  |                                                                                                   |
| Guedalia J, 2022    | Retrospective cohort       | Israel<br><br>MOH Database<br><br>August 2021 – March 2022 | Age<br>Parity<br>Days of follow-up | <i>Inclusion</i><br>Women who had a documented delivery between August 1, 2021, to March 22, 2022<br><br><i>Exclusion</i><br>Women who received one vaccine or a fourth boosting dose | 60554 | mRNA<br><br>Pfizer-BioNTech<br><br>Two doses (60554) | During pregnancy (non specified) | Maternal covid infection<br>Severe covid disease<br>Maternal hospital admission<br>Maternal death |
| Halasa NB (1), 2022 | Test negative case-control | USA<br><br>paediatric hospitals in                         | NA                                 | <i>Inclusion</i><br>Women who received the first dose                                                                                                                                 | 231   | mRNA<br><br>Pfizer-BioNTech                          | During pregnancy (non specified) | Preterm birth <37 weeks<br>NICU admission                                                         |

|  |  |                                                                   |  |                                                                                                                                                                                                                                                                                                                                                |  |                 |  |  |
|--|--|-------------------------------------------------------------------|--|------------------------------------------------------------------------------------------------------------------------------------------------------------------------------------------------------------------------------------------------------------------------------------------------------------------------------------------------|--|-----------------|--|--|
|  |  | the CDC-funded overcoming COVID-19 network July 2021 – March 2022 |  | before pregnancy and the second dose during pregnancy<br><br><i>Exclusion</i><br>Women partially vaccinated during pregnancy (I.e., received one dose during pregnancy and no dose before pregnancy) or who had been fully vaccinated before pregnancy or after delivery, women who had been vaccinated less than 14 days before delivery, and |  | Two doses (231) |  |  |
|--|--|-------------------------------------------------------------------|--|------------------------------------------------------------------------------------------------------------------------------------------------------------------------------------------------------------------------------------------------------------------------------------------------------------------------------------------------|--|-----------------|--|--|



|                 |                      |                                                                                           |                                                                                                                                                                                                                       |                                                                                                                                                                                                                                                                              |       |                                                |                         |                                                                                                                                                    |
|-----------------|----------------------|-------------------------------------------------------------------------------------------|-----------------------------------------------------------------------------------------------------------------------------------------------------------------------------------------------------------------------|------------------------------------------------------------------------------------------------------------------------------------------------------------------------------------------------------------------------------------------------------------------------------|-------|------------------------------------------------|-------------------------|----------------------------------------------------------------------------------------------------------------------------------------------------|
|                 |                      |                                                                                           |                                                                                                                                                                                                                       | women who had received a third dose of an mRNA vaccine or had received a non-mRNA vaccine (i.e., Ad26.COV2.S)                                                                                                                                                                |       |                                                |                         |                                                                                                                                                    |
| Hui L (1), 2022 | Retrospective cohort | Australia<br><br>12 Public Maternity Hospitals in Melbourne<br><br>July 2021 – March 2022 | Age<br>BMI<br>Metropolitan vs regional residence<br>Smoking<br>Region of birth<br>Socioeconomic index for postcodes<br>Diabetes<br>Parity<br>Infant sex<br>Gestation at first antenatal visit<br>Need for interpreter | <i>Inclusion</i><br>Births ≥ 20 weeks from all 12 public maternity hospitals in Melbourne from 1 <sup>st</sup> July 2021 to 1 <sup>st</sup> March 2022<br><br><i>Exclusion</i><br>Births in exclusively private hospitals and planned home births outside of publicly funded | 17365 | mRNA<br><br>Non specified<br><br>Non specified | Before/during pregnancy | Gestational diabetes<br>Stillbirth<br>Preterm birth <37 weeks<br>NICU admission<br>Abnormal apgar 5<br>Postpartum haemorrhage<br>Caesarean section |

|                    |                    |                                                              |    |                                                                                                                                                 |      |                                                                             |                                  |                                                                                                                              |
|--------------------|--------------------|--------------------------------------------------------------|----|-------------------------------------------------------------------------------------------------------------------------------------------------|------|-----------------------------------------------------------------------------|----------------------------------|------------------------------------------------------------------------------------------------------------------------------|
|                    |                    |                                                              |    | homebirth programs                                                                                                                              |      |                                                                             |                                  |                                                                                                                              |
| Ibroci E, 2022     | Prospective cohort | USA<br>Mount Sinai Health system<br>April 2020-February 2021 | NA | <i>Inclusion</i>                                                                                                                                | 250  | mRNA/Viral vector<br>Pfizer-BioNTech<br>Moderna<br>Janssen<br>Non specified | During pregnancy (1st, 2nd, 3rd) | Preterm birth <37 weeks<br>NICU admission<br>Caesarean section<br>Small for gestational age                                  |
| Juttukonda L, 2022 | Prospective cohort | USA<br>Boston Medical Center<br>July 2020 – November 2021    | NA | <i>Inclusion</i><br>Age minimum of 18 years, singleton pregnancy, full-term (gestational age ≥ 37 weeks) delivery, and English/Spanish speaking | 17   | mRNA<br>Pfizer-BioNTech<br>Moderna<br>Two doses (17)                        | During pregnancy (non specified) | Hypertensive disorder in pregnancy<br>Preterm birth <37 weeks<br>Caesarean section<br>Gestational diabetes<br>NICU admission |
| Kachikis AL, 2022  | Prospective cohort | USA<br>Questionnaire<br>January 2021 – March 2021            | NA | <i>Inclusion</i>                                                                                                                                | 7565 | mRNA/Viral vector<br>Pfizer-BioNTech<br>Moderna                             | During pregnancy (1st, 2nd, 3rd) | Fever                                                                                                                        |

|                          |                       |                                                                                |    |                                                                                                                                         |    |                                                                                                     |                                  |                                                                   |
|--------------------------|-----------------------|--------------------------------------------------------------------------------|----|-----------------------------------------------------------------------------------------------------------------------------------------|----|-----------------------------------------------------------------------------------------------------|----------------------------------|-------------------------------------------------------------------|
|                          |                       |                                                                                |    |                                                                                                                                         |    | Janssen                                                                                             |                                  |                                                                   |
|                          |                       |                                                                                |    |                                                                                                                                         |    | One dose (7565)<br>Two doses (6232)                                                                 |                                  |                                                                   |
| Kadali RAK, 2021         | Cross-sectional study | USA<br><br>Online questionnaire<br><br>Non specified                           | NA | <i>Inclusion</i><br>Pregnant women admitted for delivery who consented to sample collection for a biorepository                         | 38 | mRNA<br><br>Pfizer-BioNTech<br>Moderna<br><br>One dose (non specified)<br>Two doses (non specified) | During pregnancy (non specified) | Pain at injection site<br>Fatigue<br>Headache<br>Myalgia<br>Fever |
| Kashani-Ligumsky L, 2021 | Retrospective cohort  | Israel<br><br>Mayanei Hayeshua medical centre<br><br>February 2021- March 2021 | NA | <i>Inclusion</i><br>Women who delivered singleton livebirths<br><br><i>Exclusion</i><br>Women who contracted SARS-CoV-2 infection prior | 29 | mRNA<br><br>Pfizer-BioNTech<br><br>Two doses (29)                                                   | During pregnancy (3rd)           | Cesarean section<br>NICU admission<br>Preterm birth <37 weeks     |

|                       |                      |                                                                                                     |    |                                                                                                                                    |      |                                                                                   |                                  |                                                        |
|-----------------------|----------------------|-----------------------------------------------------------------------------------------------------|----|------------------------------------------------------------------------------------------------------------------------------------|------|-----------------------------------------------------------------------------------|----------------------------------|--------------------------------------------------------|
|                       |                      |                                                                                                     |    | to vaccination and women with single dose                                                                                          |      |                                                                                   |                                  |                                                        |
| Kim H, 2022           | Retrospective cohort | South Korea<br><br>Kyungpook National University Chilgok Hospital<br><br>November 2020 – March 2022 | NA | <i>Inclusion</i><br>All pregnant women admitted to the institution for COVID-infection between November 1, 2020, and March 7, 2022 | 39   | mRNA<br><br>Non specified<br><br>Non specified                                    | During pregnancy (Non specified) | Preterm birth <37 weeks                                |
| Komine-Aizawa S, 2022 | Retrospective cohort | Japan<br><br>Online questionnaire<br><br>October 2021 – November 2021                               | NA | <i>Inclusion</i><br>Older than 20 years old or married minors older than 16 years.                                                 | 5032 | mRNA<br><br>Pfizer-BioNTech<br>Moderna<br><br>One dose (5032)<br>Two doses (4587) | During pregnancy (1st, 2nd, 3rd) | Pain at injection site<br>Fever<br>Fatigue<br>Headache |
| Kugelman N, 2022      | Retrospective cohort | Israel<br><br>Carmel Medical Center                                                                 | NA | <i>Inclusion</i><br>Women with singleton pregnancy                                                                                 | 930  | mRNA<br><br>Pfizer-BioNTech                                                       | During pregnancy (2nd, 3rd)      | Caesarean section<br>NICU admission<br>Stillbirth      |

|            |                    |                                                            |    |                                                                                                                                                                                                                                            |    |                                                                                   |                               |                                                                                         |
|------------|--------------------|------------------------------------------------------------|----|--------------------------------------------------------------------------------------------------------------------------------------------------------------------------------------------------------------------------------------------|----|-----------------------------------------------------------------------------------|-------------------------------|-----------------------------------------------------------------------------------------|
|            |                    | February 2021 – July 2021                                  |    | over 23 weeks of gestation<br><br><i>Exclusion</i><br>Multiple gestations and those who underwent termination of pregnancy                                                                                                                 |    | One dose (51)<br>Two doses (879)                                                  |                               | Abnormal Apgar 5                                                                        |
| Li M, 2022 | Prospective cohort | China<br>Beijing Dita Hospital<br>March 2021-February 2022 | NA | <i>Inclusion</i><br>Pregnant women who inoculated or never inoculated inactivated covid-19 during the peri-pregnancy period. Pregnant women aged between 10 and 45<br><br><i>Exclusion</i><br>Family history of hereditary diseases in one | 93 | Inactivated virus<br><br>Sinovac-CoronaVac<br>Sinopharm BIBP<br><br>Non specified | Before/During pregnancy (1st) | Preterm birth <37 weeks<br>Hypertension disorder in pregnancy<br>Postpartum haemorrhage |

|  |  |  |  |                                                                                                                                                                                                                                                                                                                                                                            |  |  |  |  |
|--|--|--|--|----------------------------------------------------------------------------------------------------------------------------------------------------------------------------------------------------------------------------------------------------------------------------------------------------------------------------------------------------------------------------|--|--|--|--|
|  |  |  |  | or both families of the couple.<br>Women who delivered babies with congenital abnormalities.<br>Three or more spontaneous abortions in the past.<br>Taking drugs that have a definite effect on fetal development during pregnancy.<br>Exposure to toxic substances in early pregnancy.<br>Associated with malignant tumors.<br>Coinfection with hepatitis C, hepatitis D, |  |  |  |  |
|--|--|--|--|----------------------------------------------------------------------------------------------------------------------------------------------------------------------------------------------------------------------------------------------------------------------------------------------------------------------------------------------------------------------------|--|--|--|--|

|                  |                      |                                                                                                                                                                                                          |    |                                                                                                                                                                                                                                                                           |       |                                                                                                           |                                  |                                                      |
|------------------|----------------------|----------------------------------------------------------------------------------------------------------------------------------------------------------------------------------------------------------|----|---------------------------------------------------------------------------------------------------------------------------------------------------------------------------------------------------------------------------------------------------------------------------|-------|-----------------------------------------------------------------------------------------------------------|----------------------------------|------------------------------------------------------|
|                  |                      |                                                                                                                                                                                                          |    | human immunodeficiency virus, syphilis, toxoplasmosis, rubella or cytomegalovirus.                                                                                                                                                                                        |       |                                                                                                           |                                  |                                                      |
| Lipkind HS, 2022 | Retrospective cohort | USA<br>VSD sites in California, Colorado, Minnesota, Oregon, Washington, and Wisconsin (Kaiser Permanente: Colorado, Northern California, Northwest, Southern California, and Washington; Denver Health; | NA | <i>Inclusion</i><br>Singleton live births from eight VSD sites, females aged 16-49 years with estimated pregnancy start during May 17 – October 24, 2020, and expected delivery dates, based on a 40-week gestation, during February 21 – July 31, 2021, and all COVID-19 | 10064 | mRNA/Viral vector<br><br>Pfizer-BioNTech<br>Moderna<br>Janssen<br><br>One dose (2183)<br>Two doses (7881) | During pregnancy (1st, 2nd, 3rd) | Preterm birth <37 weeks<br>Small for gestational age |

|                     |                 |                                                                          |    |                                                                                                                                                                                                    |     |                                                                                            |                                  |                   |
|---------------------|-----------------|--------------------------------------------------------------------------|----|----------------------------------------------------------------------------------------------------------------------------------------------------------------------------------------------------|-----|--------------------------------------------------------------------------------------------|----------------------------------|-------------------|
|                     |                 | HealthPartners; and Marshfield Clinic).<br><br>December 2020 – July 2021 |    | vaccine doses administered from the last menstrual period through 3 days before delivery<br><br><i>Exclusion</i><br>Vaccines administered within 3 days of delivery                                |     |                                                                                            |                                  |                   |
| Lis-Kuberka J, 2022 | Cross-sectional | Poland<br><br>Questionnaire<br><br>November 2021 – December 2021         | NA | <i>Inclusion</i><br>Women who were pregnant and/or delivered during pandemic of COVID-19<br><br><i>Exclusion</i><br>Women who did not fully complete the questionnaire or provided unreliable data | 796 | mRNA/Viral vector<br><br>Pfizer-BioNTech<br>Moderna<br>Janssen<br>AZD<br><br>Non specified | During pregnancy (1st, 2nd, 3rd) | Caesarean section |



|                     |                      |                                                                                                                               |                                                                                                                                                                 |                                                                                                                                                                                                                                                                                                                                                                                        |       |                                                                                                        |                                  |                                                                                                                                      |
|---------------------|----------------------|-------------------------------------------------------------------------------------------------------------------------------|-----------------------------------------------------------------------------------------------------------------------------------------------------------------|----------------------------------------------------------------------------------------------------------------------------------------------------------------------------------------------------------------------------------------------------------------------------------------------------------------------------------------------------------------------------------------|-------|--------------------------------------------------------------------------------------------------------|----------------------------------|--------------------------------------------------------------------------------------------------------------------------------------|
| Magnus MC (3), 2022 | Retrospective cohort | Sweden/Norway<br><br>Pregnancy Register in Sweden and The Medical Birth Registry of Norway<br><br>January 2021 – January 2022 | Age<br>Gestational age<br>Parity<br>Education<br>Living with a partner<br>Household income<br>Previous positive SARS-CoV-2 test<br>Underlying chronic condition | <i>Inclusion</i><br>All singleton pregnancies ending after 22 completed gestational weeks registered in the Pregnancy Register in Sweden and the Medical Birth Registry of Norway from January 1, 2021, until January 12, 2022 (Sweden), or January 15, 2022 (Norway)<br><br><i>Exclusion</i><br>Pregnancies ending in multiple births, individuals vaccinated prior to pregnancy, and | 28506 | mRNA/Viral vector<br><br>Pfizer-BioNTech<br>Moderna<br>AZD<br><br>One dose (6977)<br>Two doses (21529) | During pregnancy (1st, 2nd, 3rd) | Maternal covid infection<br>Abnormal apgar 5<br>Small for gestational age<br>NICU admission<br>Stillbirth<br>Preterm birth <37 weeks |
|---------------------|----------------------|-------------------------------------------------------------------------------------------------------------------------------|-----------------------------------------------------------------------------------------------------------------------------------------------------------------|----------------------------------------------------------------------------------------------------------------------------------------------------------------------------------------------------------------------------------------------------------------------------------------------------------------------------------------------------------------------------------------|-------|--------------------------------------------------------------------------------------------------------|----------------------------------|--------------------------------------------------------------------------------------------------------------------------------------|

|                |                      |                                                             |    |                                                                                                                                                                                                                  |      |                                                                                            |                                  |                                                          |
|----------------|----------------------|-------------------------------------------------------------|----|------------------------------------------------------------------------------------------------------------------------------------------------------------------------------------------------------------------|------|--------------------------------------------------------------------------------------------|----------------------------------|----------------------------------------------------------|
|                |                      |                                                             |    | individuals who received the Johnson & Johnson vaccine                                                                                                                                                           |      |                                                                                            |                                  |                                                          |
| Mascolo A 2022 | Retrospective cohort | Israel<br><br>EV database<br><br>January 2021-December 2021 | NA | <i>Inclusion</i><br><br><i>Excluded</i><br>ICSRs with PTs referred to extraction criteria and without AEFI, uncertain information on the vaccine exposure during pregnancy, and sex or age incoherent or unknown | 3252 | mRNA/Viral vector<br><br>Pfizer-BioNTech<br>Moderna<br>Janssen<br>AZD<br><br>Non specified | During pregnancy (non specified) | Headache<br>Fatigue<br>Myalgia<br>Pain at injection site |
| Mayo RP, 2021  | Prospective cohort   | Israel<br><br>8 medical centres in Israel (Hadassah Mount   | NA | <i>Inclusion</i><br>Pregnant women admitted for delivery at 8 medical centres, $\geq 18$                                                                                                                         | 125  | mRNA<br><br>Pfizer-BioNTech<br><br>Two doses (125)                                         | During pregnancy (2nd, 3rd)      | Preterm birth <37 weeks<br>NICU admission                |

|                  |                       |                                                                                                                                |    |                                                                                                                                                                                                     |    |                                                                    |                                  |                                         |
|------------------|-----------------------|--------------------------------------------------------------------------------------------------------------------------------|----|-----------------------------------------------------------------------------------------------------------------------------------------------------------------------------------------------------|----|--------------------------------------------------------------------|----------------------------------|-----------------------------------------|
|                  |                       | Scopus, Wolfson, HaEmek, Hillel Yafe, Rabin, Shaare Zedek, Meir, and Sourasky Medical Centers)<br><br>January 2021 – June 2021 |    | years old and willing to provide informed consent<br><br><i>Exclusion</i><br>Pregnant women with active COVID-19 infection                                                                          |    |                                                                    |                                  |                                         |
| Montalti M, 2022 | Cross-sectional study | Italy<br><br>Online survey<br><br>– January 2021                                                                               | NA | <i>Inclusion</i><br>Female members of the Facebook group “Coronavirus, SARS-CoV-2 e COVID-19 gruppo per soli medici” that have been pregnant or breastfeeding for the entire duration of the survey | 31 | mRNA<br><br>Pfizer-BioNTech<br><br>One dose (31)<br>Two doses (17) | During pregnancy (non specified) | Fever<br>Fatigue<br>Myalgia<br>Headache |

|                    |                      |                                                                                                                   |     | <i>Exclusion</i>                                                                                                                                                     |       |                                                                                                                                |                                         |                                                            |
|--------------------|----------------------|-------------------------------------------------------------------------------------------------------------------|-----|----------------------------------------------------------------------------------------------------------------------------------------------------------------------|-------|--------------------------------------------------------------------------------------------------------------------------------|-----------------------------------------|------------------------------------------------------------|
| Ortqvist AK. 2022  | Retrospective cohort | Sweden<br>Norway<br>Swedish pregnancy register<br><br>Medical Birth Register in Norway<br><br>May 2021 – May 2022 | Age | <i>Exclusion:</i><br>Vaccinated prior pregnancy                                                                                                                      | 69512 | mRNA/Viral vector<br><br>Pfizer-BioNTech<br>Moderna<br>AZD<br><br>One dose (9702)<br>Two doses (47699)<br>Booster dose (12111) | Before/during pregnancy (non specified) | Gestational diabetes<br>Hypertensive disorder in pregnancy |
| Paganoti CDF, 2022 | Retrospective cohort | Brazil<br><br>SIVEP-Gripe registry<br><br>May 2021 – November 2021                                                | NA  | <i>Inclusion:</i><br>Pregnant or postpartum of childbearing age (10-55 years), COVID confirmed by PCR, SARS CoV-2 or antigen.<br>Exclusion of influenza infection by | 200   | mRNA/Inactivated virus<br><br>Non specified<br><br>Non specified                                                               | During pregnancy (non specified)        | Severe covid disease<br>Maternal death                     |

|                |                            |                                                                             |                                                                         |                                                                                                                                                                                            |      |                                                                                      |                                  |                                                  |
|----------------|----------------------------|-----------------------------------------------------------------------------|-------------------------------------------------------------------------|--------------------------------------------------------------------------------------------------------------------------------------------------------------------------------------------|------|--------------------------------------------------------------------------------------|----------------------------------|--------------------------------------------------|
|                |                            |                                                                             |                                                                         | negative RT-PCR or antigen for influenza. Availability of the outcome (recovery or death) and reliability of vaccination status.<br><br>No exclusion criteria.                             |      |                                                                                      |                                  |                                                  |
| Paixao ES 2022 | Test negative case-control | Brazil<br><br>Brazilian Ministry of Health<br><br>January 2021-October 2021 | Age<br>Ethnicity<br>Comorbidities<br>Region of residence<br>IBP<br>Time | <i>Inclusion:</i><br>Pregnant women with symptoms suggesting Covid-19, aged between 18 and 49 years in Brazil with a record of a RT-PCR test between March 15, 2021, and October 03, 2021, | 2033 | Inactivated virus<br><br>Sinovac-CoronaVac<br><br>One dose (995)<br>Two doses (1038) | During pregnancy (non specified) | Maternal covid infection<br>Severe covid disease |

|  |  |  |  |                                                                                                                                                                                                                                                                                                                                                      |  |  |  |  |
|--|--|--|--|------------------------------------------------------------------------------------------------------------------------------------------------------------------------------------------------------------------------------------------------------------------------------------------------------------------------------------------------------|--|--|--|--|
|  |  |  |  | registered in e-SUS Notifica.<br><br><i>Exclusion:</i><br>Subjects who received any Covid-10 Vaccine: ChAdOx1 nCoV-19 or Ad26.COV2.S (Janssen/Johnson & Johnson) because these are not indicated for pregnant women in Brazil and BNT162b2 numbers of women with complete regimen were too small to allow evaluation given they were included in the |  |  |  |  |
|--|--|--|--|------------------------------------------------------------------------------------------------------------------------------------------------------------------------------------------------------------------------------------------------------------------------------------------------------------------------------------------------------|--|--|--|--|

|                         |                      |                                                                                                                     |                                                                                                                              |                                                                                                                                                                                                  |       |                                                                                        |                                  |                                                                                                                                                                   |
|-------------------------|----------------------|---------------------------------------------------------------------------------------------------------------------|------------------------------------------------------------------------------------------------------------------------------|--------------------------------------------------------------------------------------------------------------------------------------------------------------------------------------------------|-------|----------------------------------------------------------------------------------------|----------------------------------|-------------------------------------------------------------------------------------------------------------------------------------------------------------------|
|                         |                      |                                                                                                                     |                                                                                                                              | Brazilian program.                                                                                                                                                                               |       |                                                                                        |                                  |                                                                                                                                                                   |
| Peretz - Machluf R 2022 | Retrospective cohort | Israel<br><br>The department of Obstetrics and Gynecology, Chaim Sheba Medical Center<br><br>March 2021 - July 2021 | Age<br>Parity<br>Smoking<br>Gestational age at delivery<br>Background conditions (Obesity, hypertensive disorders, diabetes) | <i>Inclusion</i><br>Vaccinated and non-vaccinated pregnant women with singleton pregnancies.<br><br><i>Exclusion</i><br>Women with prior COVID-19 infection, multiple gestations, and stillbirth | 3240  | mRNA<br><br>Pfizer-BioNTech<br><br>Non specified                                       | During pregnancy (2nd, 3rd)      | Gestational diabetes<br>Hypertensive disorders<br>Small for gestational age<br>Preterm birth <37 weeks<br>Caesarean section<br>Abnormal Apgar 5<br>NICU admission |
| Piekos SN, 2022         | Retrospective cohort | USA<br><br>Providence St Joseph Health<br>Alaska, California, Montana, Oregon, New Mexico, Texas, and Washington    | NA                                                                                                                           | <i>Inclusion:</i><br>18-45 years, with singleton pregnancies<br>Delivery after 20 weeks gestation.<br><br>Positive SARS Cov-2 NAAT test.                                                         | 34408 | mRNA<br><br>Pfizer-BioNTech<br>Moderna<br><br>Two doses (26792)<br>Booster dose (7616) | During pregnancy (1st, 2nd, 3rd) | Maternal covid infection<br>Maternal death<br>Caesarean section<br>Hypertensive disorders<br>Gestational diabetes                                                 |

|                       |                      |                                                                                                                         |    |                                                                                                                                                                                             |     |                                                    |                        |                                                                                                                                                   |
|-----------------------|----------------------|-------------------------------------------------------------------------------------------------------------------------|----|---------------------------------------------------------------------------------------------------------------------------------------------------------------------------------------------|-----|----------------------------------------------------|------------------------|---------------------------------------------------------------------------------------------------------------------------------------------------|
|                       |                      | Jan 2021- Jul 2022                                                                                                      |    | Propensity score matching accounting for demographic, lifestyle, geographical and clinical characteristics for negative maternal-fetal outcomes to generate an unvaccinated matched cohort. |     |                                                    |                        |                                                                                                                                                   |
| Rottenstreich M, 2022 | Retrospective cohort | Israel<br>Shaare Zedek Medical Center (SZMC) and the Bikur Holim Medical Center (BHMC)<br><br>January 2021 – April 2021 | NA | <i>Inclusion</i><br>All pregnant women admitted for delivery aged 18 years or older, with no documented previous positive SARS-CoV-2                                                        | 712 | mRNA<br><br>Pfizer-BioNTech<br><br>Two doses (712) | During pregnancy (3rd) | Severe covid disease<br>Caesarean section<br>Preterm birth <37 weeks<br>NICU admission<br>Pospartum haemorrhage<br>Abnormal Apgar 5<br>Stillbirth |



|                           |                      |                                           |    |                                                                                                                                                                                                                                                                                              |      |                                                                                |                                  |                                                                                                                                                                         |
|---------------------------|----------------------|-------------------------------------------|----|----------------------------------------------------------------------------------------------------------------------------------------------------------------------------------------------------------------------------------------------------------------------------------------------|------|--------------------------------------------------------------------------------|----------------------------------|-------------------------------------------------------------------------------------------------------------------------------------------------------------------------|
|                           |                      |                                           |    |                                                                                                                                                                                                                                                                                              |      |                                                                                |                                  | Hypertensive disorders<br>Small for gestational age                                                                                                                     |
| Rottenstreich M (1), 2022 | Retrospective cohort | Israel<br><br>August 2021 – December 2021 | NA | <p><i>Inclusion</i><br/>All women aged 18 or older, without documented previous positive SARS-CoV-2 PCR test, delivered between August 28 and December 31 2021.</p> <p><i>Exclusion</i><br/>Parturients who were previously positive with covid-19 PCR swabs during or before pregnancy.</p> | 1720 | <p>mRNA<br/>Pfizer-BioNTech</p> <p>Two doses (1094)<br/>Booster dose (626)</p> | During pregnancy (non specified) | <p>Caesarean section<br/>Postpartum haemorrhage<br/>Preterm birth &lt;37 weeks<br/>Small for gestational age<br/>Stillbirth<br/>NICU admission<br/>Abnormal Apgar 5</p> |

|                     |                            |                                                                              |                                            |                                                                                                                                                                                                                                                                           |      |                                                                                   |                                  |                              |
|---------------------|----------------------------|------------------------------------------------------------------------------|--------------------------------------------|---------------------------------------------------------------------------------------------------------------------------------------------------------------------------------------------------------------------------------------------------------------------------|------|-----------------------------------------------------------------------------------|----------------------------------|------------------------------|
|                     |                            |                                                                              |                                            | Women who received only the first dose                                                                                                                                                                                                                                    |      |                                                                                   |                                  |                              |
| Sadarangani M, 2022 | Prospective cohort         | Canada<br><br>Seven Canadian provinces and territories<br><br>-November 2021 | NA                                         | <i>Inclusion</i><br>Received first dose of an authorized COVID-19 vaccine within the prior seven days; have active email address and telephone number, can communicate in English or French, reside in one of the seven provinces and territories<br><br><i>Exclusion</i> | 5597 | mRNA<br><br>Pfizer-BioNTech<br>Moderna<br><br>One dose (5597)<br>Two doses (3108) | During pregnancy (1st, 2nd, 3rd) | Myalgia<br>Fever<br>Headache |
| Schrag SJ, 2022     | Test negative case-control | USA<br><br>Network of 306 hospitals and 164                                  | Age<br>Geographic regions<br>Calendar time | <i>Inclusion:</i><br>Aged 18-45 with COVID like illness diagnosis, RT-                                                                                                                                                                                                    | 1137 | mRNA<br><br>Pfizer-BioNTech<br>Moderna                                            | During pregnancy (1st, 2nd, 3rd) | Maternal covid infection     |

|  |  |                                                                                                          |                         |                                                                                                                                                                                                                                                                                                                                                                                                     |  |                                              |  |                             |
|--|--|----------------------------------------------------------------------------------------------------------|-------------------------|-----------------------------------------------------------------------------------------------------------------------------------------------------------------------------------------------------------------------------------------------------------------------------------------------------------------------------------------------------------------------------------------------------|--|----------------------------------------------|--|-----------------------------|
|  |  | <p>emergency department and urgent care facilities across 10 US states.</p> <p>June 2021 – June 2022</p> | Local virus circulation | <p>PCR for SARS COV-2 during 14 days before through 72 hours after the medical encounter and pregnant at the time of encounter.</p> <p>Acute respiratory illness – respiratory failure, viral or bacterial pneumonia, asthma exacerbation, influenza and viral illness otherwise not specified.</p> <p><i>Exclusion:</i><br/>Ad.26.COV2.S<br/>Janssen vaccine. Single vaccinated or more than 3</p> |  | <p>Two doses (721)<br/>Three doses (416)</p> |  | Maternal hospital admission |
|--|--|----------------------------------------------------------------------------------------------------------|-------------------------|-----------------------------------------------------------------------------------------------------------------------------------------------------------------------------------------------------------------------------------------------------------------------------------------------------------------------------------------------------------------------------------------------------|--|----------------------------------------------|--|-----------------------------|

|                      |                      |                                                                                                          |    |                                                                                                                            |       |                                                                                     |                                  |                                                                   |
|----------------------|----------------------|----------------------------------------------------------------------------------------------------------|----|----------------------------------------------------------------------------------------------------------------------------|-------|-------------------------------------------------------------------------------------|----------------------------------|-------------------------------------------------------------------|
|                      |                      |                                                                                                          |    | doses of mRNA vaccine. Those with less than 14 days between second dose and fewer than 7 days since their third dose.      |       |                                                                                     |                                  |                                                                   |
| Shanes ED (1), 2021  | Prospective cohort   | USA<br><br>January 2021 - April 2021                                                                     | NA | <i>Inclusion</i>                                                                                                           | 84    | Non specified<br><br>Non specified<br><br>Non specified                             | During pregnancy (Non specified) | Caesarean delivery                                                |
| Shimabukuro TT, 2021 | Retrospective cohort | USA<br><br>V-safe Surveillance System, V-safe pregnancy registry and VAERS system<br><br>December 2020 – | NA | <i>Inclusion</i><br>Received vaccination during pregnancy or in the periconception period and are 18 years of age or older | 16982 | mRNA<br><br>Pfizer-BioNTech<br>Moderna<br><br>One dose (16982)<br>Two doses (12273) | During pregnancy (non specified) | Pain at injection site<br>Fatigue<br>Headache<br>Myalgia<br>Fever |

|                    |                    |                                                         |    |                                                                                                                                                                                                                                                                                      |     |                                                               |                                  |                                                                                               |
|--------------------|--------------------|---------------------------------------------------------|----|--------------------------------------------------------------------------------------------------------------------------------------------------------------------------------------------------------------------------------------------------------------------------------------|-----|---------------------------------------------------------------|----------------------------------|-----------------------------------------------------------------------------------------------|
|                    |                    | February 2021                                           |    |                                                                                                                                                                                                                                                                                      |     |                                                               |                                  |                                                                                               |
| Smithgall MC, 2022 | Prospective cohort | USA<br>New York city hospital<br>April 2020 – July 2021 | NA | <i>Exclusion:</i><br>Incomplete vaccine administration<br><br><i>Inclusion:</i><br>Fully vaccinated women, at least 2 doses of a SARS-COV-2 mRNA vaccine at >2 weeks before delivery, included if they did not have positive anti-N antibodies produced in the setting of infection. | 164 | mRNA<br><br>Pfizer-BioNTech<br>Moderna<br><br>Two doses (164) | During pregnancy (non specified) | Caesarena section<br>Preterm birth < 37 week<br>Abnormal Apgar 5<br>Small for gestational age |
| Sourouni M, 2022   | Prospective cohort | Germany                                                 | NA | <i>Inclusion</i><br>Women given birth at the hospital who                                                                                                                                                                                                                            | 70  | mRNA<br><br>Pfizer-BioNTech                                   | During pregnancy (1st, 2nd, 3rd) | Fever<br>Pain at injection site                                                               |

|               |                     |                                                   |                                                                                                              |                                                                                                                                                                                                                                        |       |                                                                                                                                                         |                                    |             |
|---------------|---------------------|---------------------------------------------------|--------------------------------------------------------------------------------------------------------------|----------------------------------------------------------------------------------------------------------------------------------------------------------------------------------------------------------------------------------------|-------|---------------------------------------------------------------------------------------------------------------------------------------------------------|------------------------------------|-------------|
|               |                     | University hospital of Münster                    |                                                                                                              | were vaccinated during pregnancy                                                                                                                                                                                                       |       | Moderna<br>Non specified                                                                                                                                |                                    |             |
|               |                     | March 2021 – November 2021                        |                                                                                                              |                                                                                                                                                                                                                                        |       |                                                                                                                                                         |                                    |             |
| Stock S, 2022 | Retrospective study | UK<br>COPS cohort<br>September 2021- January 2022 | Age<br>Gestational age at date of vaccination<br>Deprivation<br>Urban/rural status<br>Clinical vulnerability | <i>Inclusion:</i><br>Vaccinated from 6 weeks before conception to 19 weeks and 6 days gestation for miscarriage and 2+6 weeks for ectopic pregnancy.<br><br><i>Exclusion:</i><br>Completed pregnancies with unknown pregnancy outcome. | 18780 | mRNA/Viral vector<br><br>Pfizer-BioNTech<br>Moderna<br>AZD<br><br>One dose (non specified)<br>Two doses (Non specified)<br>Booster dose (Non specified) | Before/During pregnancy (1st, 2nd) | Miscarriage |

|                           |                      |                                                                                                                  |    |                                                                                                                                                                                                                                                                               |     |                                                                                     |                                  |                                                                                                                                                                                                                            |
|---------------------------|----------------------|------------------------------------------------------------------------------------------------------------------|----|-------------------------------------------------------------------------------------------------------------------------------------------------------------------------------------------------------------------------------------------------------------------------------|-----|-------------------------------------------------------------------------------------|----------------------------------|----------------------------------------------------------------------------------------------------------------------------------------------------------------------------------------------------------------------------|
| Theiler RN, 2021          | Retrospective cohort | United States of America<br><br>Hospitals within the Mayo Clinic Health System<br><br>December 2021 – April 2021 | NA | <i>Inclusion</i><br>All women aged 16-55 years old who delivered between December 10, 2020, and April 19, 2021 at a Mayo Clinic hospital.<br><br><i>Exclusion</i><br>Minnesota patients who delivered in Minnesota and opted out of use of their medical records for research | 140 | mRNA/Viral vector<br><br>Pfizer-BioNTech<br>Moderna<br>Janssen<br><br>Non specified | During pregnancy (1st, 2nd, 3rd) | Maternal covid infection<br>Severe covid disease<br>Maternal death<br>Caesarean section<br>Preterm birth <37 weeks<br>NICU admission<br>Abnormal Apgar 5<br>Stillbirth<br>Hypertensive disorders<br>Postpartum haemorrhage |
| Toussia-Cohen S (2), 2022 | Prospective cohort   | Israel<br><br>Online questionnaire<br><br>January 2021 – November 2021                                           | NA | <i>Exclusion:</i><br>Chronic hypertension, chronic kidney disease, antiphospholipid syndrome, systemic lupus,                                                                                                                                                                 | 162 | mRNA<br><br>Pfizer-BioNTech<br><br>Doses 1 and 2 (78)                               | During pregnancy (2nd, 3rd)      | Fever<br>Myalgia<br>Headache<br>Fatigue                                                                                                                                                                                    |

|                                                            |                      |                                                                                                                       |                                                                                                      |                                                                                                                                              |        |                                                                                                    |                                  |                                                                                                                            |
|------------------------------------------------------------|----------------------|-----------------------------------------------------------------------------------------------------------------------|------------------------------------------------------------------------------------------------------|----------------------------------------------------------------------------------------------------------------------------------------------|--------|----------------------------------------------------------------------------------------------------|----------------------------------|----------------------------------------------------------------------------------------------------------------------------|
|                                                            |                      |                                                                                                                       |                                                                                                      | multiple gestation, and previous preterm birth. Positive PCR SARS COV2 test before or during the study period.                               |        | Booster dose (84)                                                                                  |                                  |                                                                                                                            |
| UKHSA 27 January 2022 COVID-19 Vaccine Surveillance Report | Retrospective cohort | United Kingdom<br><br>UKHSA<br><br>January 2021 – June 2022                                                           | NA                                                                                                   | Not reported                                                                                                                                 | 258639 | mRNA/Viral vector<br><br>Pfizer-BioNTech<br>Moderna<br>AZD                                         | During pregnancy (non specified) | Preterm birth <37 weeks<br>Stillbirth                                                                                      |
| Villar J, 2023                                             | Prospective cohort   | Argentina, Brazil, Egypt, France, Indonesia, Israel, Italy, Japan, Mexico, Nigeria, North Macedonia, Pakistan, Spain, | Age<br>Overweight or obesity<br>Presence or absence of any pre-existing medical condition<br>Country | <i>Inclusion</i><br>Women with a documented diagnosis of covid-19. Live and stillborn singleton and multiple births, and newborn babies with | 2886   | mRNA/Viral vector/Inactivated virus<br><br>Pfizer-BioNTech<br>Moderna<br>Janssen<br>AZD<br>SinoVac | During pregnancy (non specified) | Maternal covid infection<br>Severe covid disease<br>Caesarean section<br>Hypertensive disorders<br>Preterm birth <37 weeks |



|                    |                      |                                                                      |    |                                                                                                                                                    |     |                                                                                                                |                                  |       |
|--------------------|----------------------|----------------------------------------------------------------------|----|----------------------------------------------------------------------------------------------------------------------------------------------------|-----|----------------------------------------------------------------------------------------------------------------|----------------------------------|-------|
|                    |                      | Switzerland, Türkiye, UK, Uruguay and USA                            |    | congenital anomalies.                                                                                                                              |     | Bharat Biotech<br>Sinopharm                                                                                    |                                  |       |
|                    |                      | Hospitals part of the Oxford Maternal and Perinatal Health institute |    |                                                                                                                                                    |     | One dose (non specified)<br>Two doses (non specified)<br>Booster dose (non specified)                          |                                  |       |
|                    |                      | November 2021 – June 2022                                            |    |                                                                                                                                                    |     |                                                                                                                |                                  |       |
| Voiniusyte A, 2022 | Retrospective cohort | Lithuania<br><br>Online questionnaire<br><br>-July 2021              | NA | <i>Inclusion</i><br>Pregnant women primarily located in Lithuania who received at least one dose before giving birth.<br>Enrollment was voluntary. | 227 | mRNA/Viral vector<br><br>Pfizer-BioNTech<br>Moderna<br>Janssen<br>AZD<br><br>One dose (227)<br>Two doses (157) | During pregnancy (1st, 2nd, 3rd) | Fever |

|                   |                       |                                                                                |               |                                                                                                                                                      |     |                                                                                          |                             |                                                                                                                                                |
|-------------------|-----------------------|--------------------------------------------------------------------------------|---------------|------------------------------------------------------------------------------------------------------------------------------------------------------|-----|------------------------------------------------------------------------------------------|-----------------------------|------------------------------------------------------------------------------------------------------------------------------------------------|
| Wainstock T, 2021 | Retrospective cohort  | Israel<br><br>Soroka University Medical Center<br><br>January 2021 – June 2021 | Non specified | <i>Inclusion</i><br>All women who delivered singletons between January and June 2021 at the Soroka University Medical Center<br><br><i>Exclusion</i> | 913 | mRNA<br><br>Pfizer-BioNTech<br><br>One dose (non specified)<br>Two doses (non specified) | During pregnancy (2nd, 3rd) | Caesarean section<br>Gestational diabetes<br>Hypertensive disorders<br>Abnormal Apgar 5<br>Postpartum haemorrhage<br>Small for gestational age |
| Wang Y (1), 2022  | Retrospective cohort  | China<br><br>Peking University Third Hospital<br><br>Non specified             | NA            | <i>Inclusion:</i><br>Completed gamete retrieval and embryo cryopreservation before getting vaccinated with inactivated COVID-19 vaccine.             | 460 | Inactivated virus<br><br>Non specified<br><br>Two doses (460)                            | Before pregnancy            | Miscarriage                                                                                                                                    |
| Zdanowski W, 2022 | Cross-sectional study | Poland                                                                         | NA            | <i>Exclusions</i>                                                                                                                                    | 169 | mRNA                                                                                     | During pregnancy            | Pain at injection site<br>Headache                                                                                                             |

|  |  |                                                   |  |                                                                  |  |                                                      |                 |                             |
|--|--|---------------------------------------------------|--|------------------------------------------------------------------|--|------------------------------------------------------|-----------------|-----------------------------|
|  |  | Online questionnaire<br>May 2021 – September 2021 |  | Moderna and AstraZeneca vaccines.<br>First dose before pregnancy |  | Pfizer-BioNTech<br>One dose (169)<br>Two doses (121) | (non specified) | Fever<br>Myalgia<br>Fatigue |
|--|--|---------------------------------------------------|--|------------------------------------------------------------------|--|------------------------------------------------------|-----------------|-----------------------------|
