# Supplementary material for: Effectiveness and safety of COVID-19 vaccines on maternal and perinatal outcomes: a systematic review and meta-analysis
Source: PubMed Central journal article supplement (PMC11002410; doi:10.1136/bmjgh-2023-014247), 2024-04-04

## Appendix 5. Vaccine effectiveness for SARS-CoV-2 infection-related outcomes (unadjusted analysis)

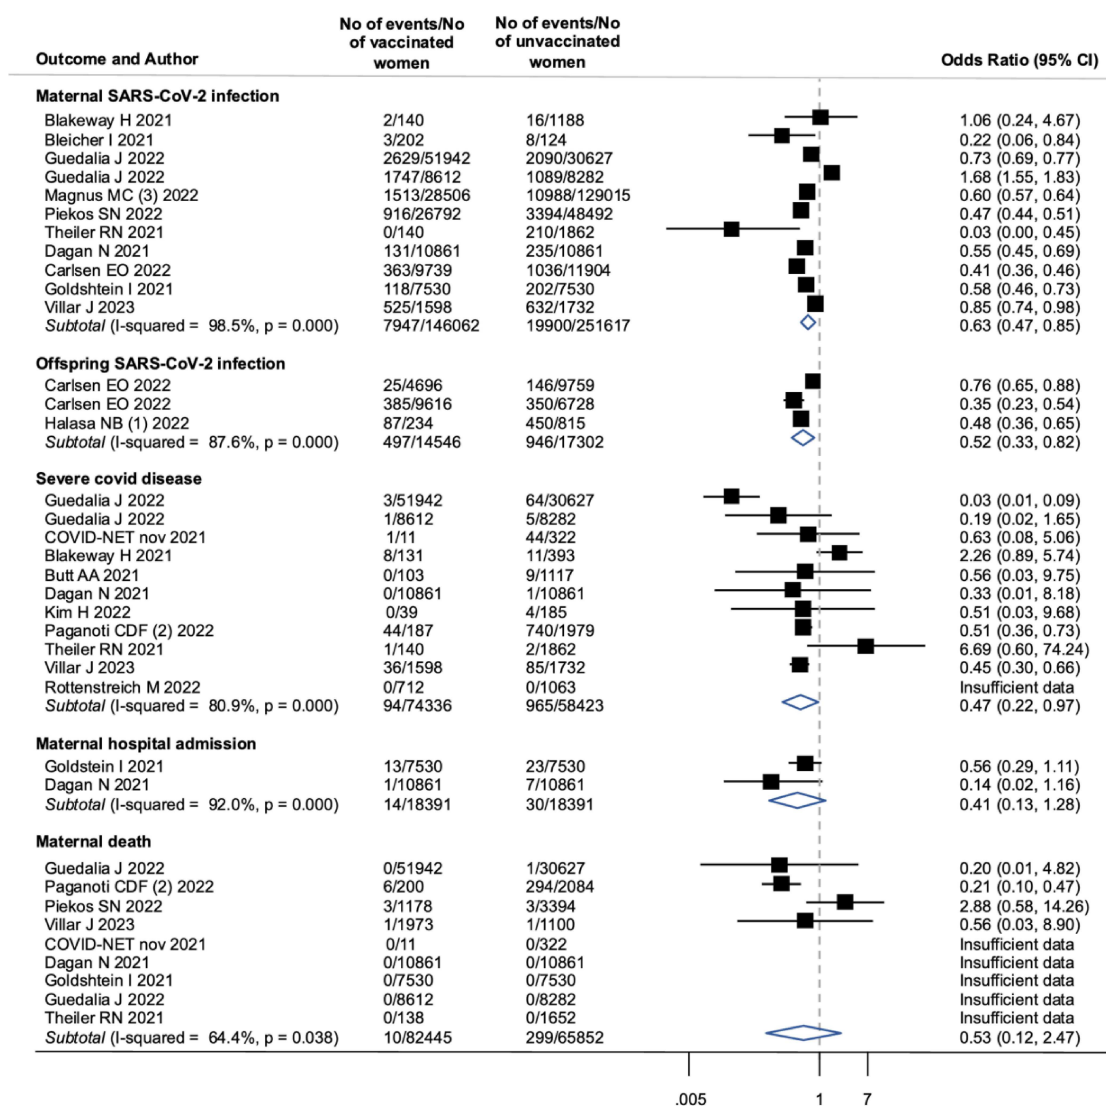

Supplement: bmjgh-2023-014247supp005.pdf [file bmjgh-2023-014247supp005.pdf]
