# Supplementary material for: Effectiveness and safety of COVID-19 vaccines on maternal and perinatal outcomes: a systematic review and meta-analysis
Source: PubMed Central journal article supplement (PMC11002410; doi:10.1136/bmjgh-2023-014247), 2024-04-04

Appendix 9. Vaccine safety for pregnancy-related offspring outcomes (adjusted individual studies)

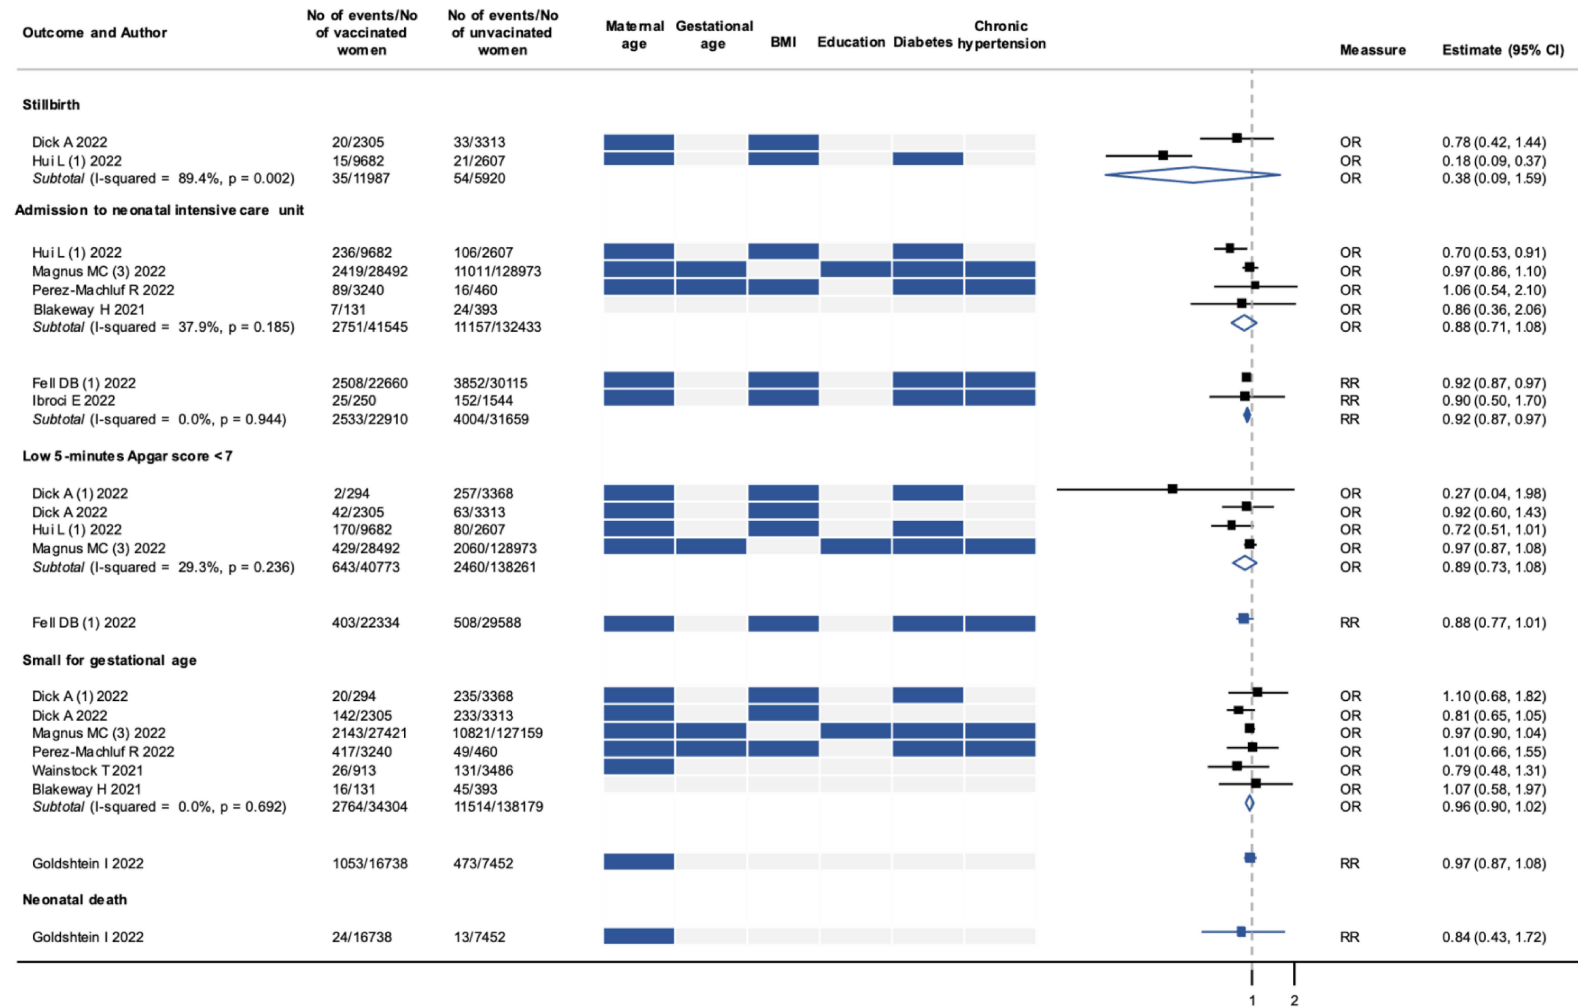

Supplement: bmjgh-2023-014247supp009.pdf [file bmjgh-2023-014247supp009.pdf]
